# Supplementary material for: The primary controlling factors of the occurrence state of deep high-rank coalbed methane in eastern Ordos Basin
Source: Frontiers journal article supplement (doi:10.3389/feart.2024.1340523), 2024-01-22
Supplement: Table_1.XLSX [file Table_1.XLSX]

## Sheet: Figure 3
figure 3a
	30 ℃		45 ℃		60 ℃		75 ℃		120 ℃
0	0	0	0	0	0	0	0	0	0
0.291	5.835	0.495	6.671	0.388	4.403	0.384	3.399	0.347	1.335
2.331	18.984	2.552	17.042	2.039	13.04	2.371	11.943	2.149	6.309
4.41	24.308	4.244	21.066	4.254	18.381	4.436	16.173	4.385	9.613
7.305	28.423	7.181	25.19	7.102	22.184	7.423	19.723	7.127	12.053
10.082	30.785	10.158	27.666	10.49	24.84	10.069	21.683	10.414	13.883
14.225	32.866	14.41	29.75	14.256	26.612	14.233	23.621	14.279	15.239
16.553	33.58	16.082	30.286	17.924	27.673	16.153	24.222	16.328	15.745
18.084	33.934	18.237	30.821	21.528	28.335	18.135	24.713	18.258	16.127
20.16	34.305	20.331	31.213			20.48	25.163	20.285	16.454
figure 3b
30	0.15228
45	0.13963
65	0.12917
75	0.1204
120	0.10088

## Sheet: Figure 4
	VL	PL
30	37.69	2.53
45	36.26	2.868
60	30.95	2.912
75	30.93	3.383
120	19.76	3.543

## Sheet: Figure 5
Figure 5a				Figure 5b
0	0			0.5	0.00267
1.007	5.537			2	0.01079
3.127	11.067			1	0.00536
6.08	14.65			4	0.02188
8.452	16.208			6	0.03321
10.596	17.177			8	0.04474
13.373	18.113			12	0.06803
15.523	18.712			10	0.05638
15.392	18.686			15	0.08535
				20	0.113
				25	0.13823

## Sheet: Figure 6
	H2O			CH4
Distance	Mass		Distance	density
0.284098	0.0331505		0.284098	-0.0251434
0.852294	0.0333847		0.852294	-0.0230839
1.42049	0.0355102		1.42049	-0.0179991
1.98869	0.0402968		1.98869	-0.0148032
2.55688	0.0472522		2.55688	-0.0174678
3.12508	0.0532794		3.12508	-0.0263814
3.69327	0.0616131		3.69327	-0.0361602
4.26147	0.070781		4.26147	-0.0429779
4.82966	0.0811057		4.82966	-0.0480507
5.39786	0.0897135		5.39786	-0.0512182
5.96606	0.0892396		5.96606	-0.0496863
6.53425	0.081933		6.53425	-0.0441968
7.10245	0.0725226		7.10245	-0.0363707
7.67064	0.060561		7.67064	-0.0278065
8.23884	0.0495294		8.23884	-0.0206774
8.80703	0.0397569		8.80703	-0.0161057
9.37523	0.0331319		9.37523	-0.0136845
9.94343	0.0285547		9.94343	-0.0137899
10.5116	0.0238509		10.5116	-0.0157408
11.0798	0.0201599		11.0798	-0.0173837
11.648	0.0214568		11.648	-0.0167627
12.2162	0.0229612		12.2162	-0.0132654
12.7844	0.0211699		12.7844	-0.00876225
13.3526	0.0172945		13.3526	-0.00531528
13.9208	0.0173513		13.9208	-0.00436775
14.489	0.0197361		14.489	-0.00473042
15.0572	0.0200877		15.0572	-0.00594936
15.6254	0.0171449		15.6254	-0.00779999
16.1936	0.0146112		16.1936	-0.00979053
16.7618	0.0167355		16.7618	-0.0114565
17.33	0.0233501		17.33	-0.0139204
17.8982	0.0305381		17.8982	-0.0162291
18.4664	0.036515		18.4664	-0.0179194
19.0346	0.0389754		19.0346	-0.0185253
19.6028	0.0374193		19.6028	-0.0186947
20.1709	0.0342974		20.1709	-0.0190492
20.7391	0.0333638		20.7391	-0.0199092
21.3073	0.0362553		21.3073	-0.0198006
21.8755	0.037187		21.8755	-0.0166273
22.4437	0.0320049		22.4437	-0.0122966
23.0119	0.0235506		23.0119	-0.00927086
23.5801	0.0172517		23.5801	-0.00846776
24.1483	0.0136459		24.1483	-0.00913832
24.7165	0.0111872		24.7165	-0.00953801
25.2847	0.0113854		25.2847	-0.00825743
25.8529	0.0158994		25.8529	-0.00550152
26.4211	0.023348		26.4211	-0.00442781
26.9893	0.028959		26.9893	-0.00889729
27.5575	0.0332517		27.5575	-0.0186578
28.1257	0.0392554		28.1257	-0.0276026
28.6939	0.0458581		28.6939	-0.0308654
29.2621	0.0515077		29.2621	-0.0287405
29.8303	0.050697		29.8303	-0.0256991
30.3985	0.0429097		30.3985	-0.0225122
30.9667	0.0340489		30.9667	-0.018189
31.5349	0.0270955		31.5349	-0.0129332
32.1031	0.0252589		32.1031	-0.0104491
32.6713	0.0261068		32.6713	-0.0128871
33.2395	0.0292932		33.2395	-0.0183702
33.8076	0.0327942		33.8076	-0.0230627

## Sheet: Figure 7
Figure 7a											Figure 7b
	0		0.1		0.2		0.49					Dry	0.1	0.2	0.49
0.1	0.26159	0.1	0.27571	0.1	0.23115	0.1	0.23796				-7.55242	0	0	0	0
1.75833	2.73664	1.75833	2.70265	1.75833	2.47656	1.75833	2.36562				-7.39829	0	0	0	0
3.41667	4.769	3.41667	4.78859	3.41667	4.32572	3.41667	3.7234				-7.24416	0	0	0	0
5.075	6.58001	5.075	6.54804	5.075	5.81165	5.075	4.95521				-7.09003	0	0	0	0
6.73333	8.57212	6.73333	8.30749	6.73333	7.11597	6.73333	5.89306				-6.93589	0	0	0	0
8.39167	10.5844	8.39167	9.75858	8.39167	8.20565	8.39167	6.64894				-6.78176	0	0	0	0
10.05	12.335	10.05	11.0101	10.05	9.42742	10.05	7.11086				-6.62763	0	0	0	0
11.7083	13.7234	11.7083	12.5882	11.7083	10.3355	11.7083	7.76876				-6.4735	0	0	0	0
13.3667	15.3131	13.3667	13.4044	13.3667	11.2766	13.3667	8.1187				-6.31937	0	0	0	0
15.025	16.6009	15.025	14.0756	15.025	11.8214	15.025	8.32867				-6.16524	0	0	0	0
											-6.01111	0	0	0	0
											-5.85698	0	0	0	0
											-5.70285	0	0	0	0
											-5.54872	0	0	0	0
											-5.39459	0	0	0	0
											-5.24045	0	0	0	0
											-5.08632	0	0	0	0
											-4.93219	0	0	0	0
											-4.77806	0	0	0	0
											-4.62393	6.37618e-05	7.01882e-05	5.72299e-05	4.18649e-05
											-4.4698	0.000480293	0.000571585	0.000516391	0.000599261
											-4.31567	0.00143	0.00165	0.00157	0.00187
											-4.16154	0.0034	0.00377	0.00383	0.00447
											-4.00741	0.00694	0.00723	0.00789	0.00867
											-3.85328	0.0126	0.01254	0.01448	0.01522
											-3.69914	0.0208	0.02054	0.0245	0.02489
											-3.54501	0.02997	0.02987	0.03608	0.03641
											-3.39088	0.03844	0.03923	0.04689	0.04729
											-3.23675	0.04666	0.0481	0.05506	0.05651
											-3.08262	0.05573	0.05755	0.06085	0.06371
											-2.92849	0.06693	0.06914	0.06624	0.0698
											-2.77436	0.0801	0.0834	0.07271	0.07401
											-2.62023	0.09262	0.09796	0.07914	0.07603
											-2.4661	0.10442	0.11192	0.08623	0.07822
											-2.31197	0.11266	0.12233	0.09293	0.08035
											-2.15783	0.11469	0.12713	0.09826	0.08073
											-2.0037	0.11196	0.12672	0.10167	0.07961
											-1.84957	0.10718	0.12337	0.10233	0.07726
											-1.69544	0.10184	0.11825	0.1007	0.07567
											-1.54131	0.09752	0.11366	0.09958	0.07664
											-1.38718	0.09332	0.11051	0.101	0.08018
											-1.23305	0.08946	0.10834	0.10488	0.08665
											-1.07892	0.08621	0.10619	0.10841	0.09628
											-0.92479	0.08416	0.10379	0.10941	0.10954
											-0.77066	0.08292	0.10165	0.10804	0.126
											-0.61652	0.08242	0.10078	0.10603	0.14232
											-0.46239	0.08314	0.10104	0.10476	0.15466
											-0.30826	0.08472	0.10175	0.10444	0.16139
											-0.15413	0.0862	0.10289	0.10448	0.16409
											0	0.0863	0.10371	0.10427	0.1648
											0.15413	0.08504	0.10452	0.10369	0.16474
											0.30826	0.08327	0.10544	0.10342	0.16441
											0.46239	0.08231	0.1054	0.1033	0.16396
											0.61652	0.08233	0.10436	0.10334	0.16377
											0.77066	0.08298	0.10363	0.10307	0.16346
											0.92479	0.08316	0.10416	0.10271	0.16305
											1.07892	0.08291	0.10612	0.10195	0.16316
											1.23305	0.08221	0.10769	0.10097	0.16368
											1.38718	0.08139	0.1071	0.10099	0.16334
											1.54131	0.08041	0.10358	0.10283	0.15996
											1.69544	0.07995	0.09725	0.10475	0.15028
											1.84957	0.08093	0.08858	0.10384	0.13093
											2.0037	0.08315	0.07896	0.09846	0.10132
											2.15783	0.08631	0.06994	0.08989	0.06779
											2.31197	0.09056	0.06336	0.0813	0.03921
											2.4661	0.09533	0.06026	0.07601	0.02081
											2.62023	0.10035	0.05957	0.07379	0.01181
											2.77436	0.10592	0.05998	0.07257	0.00822
											2.92849	0.11025	0.05928	0.0699	0.00622
											3.08262	0.11158	0.05647	0.06537	0.00414
											3.23675	0.11012	0.05239	0.06014	0.00209
											3.39088	0.10759	0.04958	0.05633	0.000744018
											3.54501	0.10411	0.04906	0.0542	0.000123107
											3.69914	0.09864	0.04971	0.05308	0
											3.85328	0.08727	0.04787	0.05008	0
											4.00741	0.06811	0.04108	0.04304	0
											4.16154	0.04459	0.02932	0.03139	0
											4.31567	0.02334	0.01668	0.01831	0
											4.4698	0.00903	0.0071	0.0079	0
											4.62393	0.00244	0.00208	0.00233	0
											4.77806	0.000280433	0.000325233	0.000285819	0
											4.93219	2.20831e-06	1.538e-05	1.10416e-06	0
											5.08632	0	0	0	0
											5.24045	0	0	0	0
											5.39459	0	0	0	0
											5.54872	0	0	0	0
											5.70285	0	0	0	0
											5.85698	0	0	0	0
											6.01111	0	0	0	0
											6.16524	0	0	0	0
											6.31937	0	0	0	0
											6.4735	0	0	0	0
											6.62763	0	0	0	0
											6.78176	0	0	0	0
											6.93589	0	0	0	0
											7.09003	0	0	0	0
											7.24416	0	0	0	0
											7.39829	0	0	0	0
											7.55242	0	0	0	0
											7.70655	0	0	0	0

## Sheet: Figure 8
	0.6		0.8		1.3		1.8
-1.45966	0	-1.55634	0	-1.80686	0	-2.0475	0
-1.40932	0	-1.50268	0	-1.75372	0	-1.995	0
-1.35899	0	-1.44901	0	-1.70058	0	-1.9425	0
-1.30866	0	-1.39534	0	-1.64743	0	-1.89	0
-1.25833	0	-1.34168	0	-1.59429	0	-1.8375	0
-1.20799	0	-1.28801	0	-1.54115	0	-1.785	0
-1.15766	0	-1.23434	0	-1.488	0	-1.7325	0
-1.10733	0	-1.18067	0	-1.43486	0	-1.68	0
-1.05699	0	-1.12701	0	-1.38172	0	-1.6275	0
-1.00666	0	-1.07334	0	-1.32858	0	-1.575	0
-0.95633	0	-1.01967	0	-1.27543	0	-1.5225	0
-0.90599	0	-0.96601	0	-1.22229	0	-1.47	0
-0.85566	0	-0.91234	0	-1.16915	0	-1.4175	0
-0.80533	0	-0.85867	0	-1.116	0	-1.365	0
-0.755	0	-0.80501	0	-1.06286	0	-1.3125	0
-0.70466	0	-0.75134	0	-1.00972	0	-1.26	0
-0.65433	0	-0.69767	0	-0.95657	0	-1.2075	0
-0.604	0	-0.644	0	-0.90343	0	-1.155	0
-0.55366	0	-0.59034	0	-0.85029	0	-1.1025	0
-0.50333	0	-0.53667	0	-0.79715	0	-1.05	0
-0.453	0	-0.483	0	-0.744	0	-0.9975	0
-0.40266	0	-0.42934	0	-0.69086	0	-0.945	0
-0.35233	0	-0.37567	0	-0.63772	0	-0.8925	0
-0.302	0	-0.322	9.73256e-05	-0.58457	0.000163808	-0.84	6.60113e-05
-0.25167	0.000172952	-0.26834	0.00106	-0.53143	0.00257	-0.7875	0.00126
-0.20133	0.0021	-0.21467	0.0093	-0.47829	0.01735	-0.735	0.00929
-0.151	0.01572	-0.161	0.0313	-0.42514	0.05179	-0.6825	0.03481
-0.10067	0.05056	-0.10733	0.0734	-0.372	0.10157	-0.63	0.07853
-0.05033	0.10299	-0.05367	0.12489	-0.31886	0.14085	-0.5775	0.12616
0	0.14683	0	0.16171	-0.26572	0.14192	-0.525	0.14655
0.05033	0.14716	0.05367	0.16358	-0.21257	0.10981	-0.4725	0.12686
0.10067	0.1037	0.10733	0.12815	-0.15943	0.07699	-0.42	0.08732
0.151	0.05119	0.161	0.07492	-0.10629	0.06585	-0.3675	0.0574
0.20133	0.01597	0.21467	0.0321	-0.05314	0.07682	-0.315	0.04997
0.25167	0.00217	0.26834	0.00875	0	0.09311	-0.2625	0.06294
0.302	0.000138361	0.322	0.00111	0.05314	0.0952	-0.21	0.08155
0.35233	0	0.37567	8.11047e-05	0.10629	0.0803	-0.1575	0.09253
0.40266	0	0.42934	0	0.15943	0.06719	-0.105	0.08676
0.453	0	0.483	0	0.21257	0.07751	-0.0525	0.07133
0.50333	0	0.53667	0	0.26572	0.10833	0	0.05766
0.55366	0	0.59034	0	0.31886	0.13817	0.05275	0.0537
0.604	0	0.644	0	0.372	0.13545	0.1055	0.06181
0.65433	0	0.69767	0	0.42514	0.0963	0.15825	0.07772
0.70466	0	0.75134	0	0.47829	0.04816	0.211	0.08939
0.755	0	0.80501	0	0.53143	0.01597	0.26375	0.09016
0.80533	0	0.85867	0	0.58457	0.00209	0.3165	0.07898
0.85566	0	0.91234	0	0.63772	0.000163808	0.36925	0.0655
0.90599	0	0.96601	0	0.69086	0	0.422	0.06604
0.95633	0	1.01967	0	0.744	0	0.47475	0.08828
1.00666	0	1.07334	0	0.79715	0	0.5275	0.11955
1.05699	0	1.12701	0	0.85029	0	0.58025	0.1353
1.10733	0	1.18067	0	0.90343	0	0.633	0.11625
1.15766	0	1.23434	0	0.95657	0	0.68575	0.07335
1.20799	0	1.28801	0	1.00972	0	0.7385	0.03277
1.25833	0	1.34168	0	1.06286	0	0.79125	0.00925
1.30866	0	1.39534	0	1.116	0	0.844	0.00109
1.35899	0	1.44901	0	1.16915	0	0.89675	6.60113e-05
1.40932	0	1.50268	0	1.22229	0	0.9495	0
1.45966	0	1.55634	0	1.27543	0	1.00225	0
1.50999	0	1.61001	0	1.32858	0	1.055	0
				1.38172	0	1.10775	0
				1.43486	0	1.1605	0
				1.488	0	1.21325	0
				1.54115	0	1.266	0
				1.59429	0	1.31875	0
				1.64743	0	1.3715	0
				1.70058	0	1.42425	0
				1.75372	0	1.477	0
				1.80686	0	1.52975	0
				1.86001	0	1.5825	0
						1.63525	0
						1.688	0
						1.74075	0
						1.7935	0
						1.84625	0
						1.899	0
						1.95175	0
						2.0045	0
						2.05725	0
						2.11	0

## Sheet: Figure 9
Figure 9a									Figure 9b
	2nm	3nm	4nm	8nm						2nm		3nm		4nm		8nm
0	0	0	0	0					-2.3128	0	-2.8028	0	-3.2928	0	-5.2528	0
1.007	6.173	5.946	5.659	4.984					-2.2656	0	-2.7456	0	-3.2256	0	-5.1456	0
3.127	11.042	11.199	10.981	10.127					-2.2184	0	-2.6884	0	-3.1584	0	-5.0384	0
6.08	13.952	14.413	14.466	14.121					-2.1712	0	-2.6312	0	-3.0912	0	-4.9312	0
8.452	15.04	15.592	15.867	16.274					-2.124	0	-2.574	0	-3.024	0	-4.824	0
10.596	15.411	16.079	16.55	17.788					-2.0768	0	-2.5168	0	-2.9568	0	-4.7168	0
13.373	15.567	16.529	17.293	19.794					-2.0296	0	-2.4596	0	-2.8896	0	-4.6096	0
15.523	15.471	16.718	17.722	21.226					-1.9824	0	-2.4024	0	-2.8224	0	-4.5024	0
									-1.9352	0	-2.3452	0	-2.7552	0	-4.3952	0
									-1.888	0	-2.288	0	-2.688	0	-4.288	0
									-1.8408	0	-2.2308	0	-2.6208	0	-4.1808	0.000881072
									-1.7936	0	-2.1736	0	-2.5536	0	-4.0736	0.01193
									-1.7464	0	-2.1164	0	-2.4864	0	-3.9664	0.03588
									-1.6992	0	-2.0592	0	-2.4192	0	-3.8592	0.07083
									-1.652	0	-2.002	0	-2.352	0	-3.752	0.0986
									-1.6048	0	-1.9448	0	-2.2848	0	-3.6448	0.10398
									-1.5576	0	-1.8876	0	-2.2176	0	-3.5376	0.09713
									-1.5104	0	-1.8304	0	-2.1504	1.32702e-05	-3.4304	0.09251
									-1.4632	0	-1.7732	0	-2.0832	0.00113	-3.3232	0.08889
									-1.416	0	-1.716	0	-2.016	0.01239	-3.216	0.08755
									-1.3688	0	-1.6588	0	-1.9488	0.03997	-3.1088	0.08637
									-1.3216	0	-1.6016	0.000175263	-1.8816	0.08227	-3.0016	0.08602
									-1.2744	0	-1.5444	0.00233	-1.8144	0.11774	-2.8944	0.08609
									-1.2272	0	-1.4872	0.01777	-1.7472	0.12184	-2.7872	0.08679
									-1.18	0	-1.43	0.05811	-1.68	0.10035	-2.68	0.08815
									-1.1328	0	-1.3728	0.12122	-1.6128	0.07983	-2.5728	0.08803
									-1.0856	6.24692e-06	-1.3156	0.17869	-1.5456	0.07535	-2.4656	0.08568
									-1.0384	0.000475002	-1.2584	0.19043	-1.4784	0.08342	-2.3584	0.084
									-0.9912	0.00406	-1.2012	0.15386	-1.4112	0.08832	-2.2512	0.08504
									-0.944	0.02272	-1.144	0.10844	-1.344	0.08579	-2.144	0.08713
									-0.8968	0.06938	-1.0868	0.09018	-1.2768	0.08285	-2.0368	0.08847
									-0.8496	0.14067	-1.0296	0.1047	-1.2096	0.08325	-1.9296	0.08867
									-0.8024	0.20641	-0.9724	0.1325	-1.1424	0.08571	-1.8224	0.08777
									-0.7552	0.22251	-0.9152	0.14729	-1.0752	0.08611	-1.7152	0.08671
									-0.708	0.18244	-0.858	0.14025	-1.008	0.08394	-1.608	0.08642
									-0.6608	0.12588	-0.8008	0.12081	-0.9408	0.0817	-1.5008	0.0865
									-0.6136	0.09117	-0.7436	0.10674	-0.8736	0.08199	-1.3936	0.08698
									-0.5664	0.09113	-0.6864	0.10682	-0.8064	0.08384	-1.2864	0.08722
									-0.5192	0.11456	-0.6292	0.11958	-0.7392	0.08544	-1.1792	0.08744
									-0.472	0.14046	-0.572	0.1337	-0.672	0.08528	-1.072	0.08738
									-0.4248	0.15588	-0.5148	0.13839	-0.6048	0.0837	-0.9648	0.08728
									-0.3776	0.15387	-0.4576	0.13183	-0.5376	0.08292	-0.8576	0.08732
									-0.3304	0.13544	-0.4004	0.12082	-0.4704	0.08309	-0.7504	0.08735
									-0.2832	0.11311	-0.3432	0.11417	-0.4032	0.08296	-0.6432	0.08622
									-0.236	0.0988	-0.286	0.11402	-0.336	0.08229	-0.536	0.08487
									-0.1888	0.09808	-0.2288	0.11695	-0.2688	0.08093	-0.4288	0.08454
									-0.1416	0.10932	-0.1716	0.11944	-0.2016	0.08099	-0.3216	0.08556
									-0.0944	0.12517	-0.1144	0.12211	-0.1344	0.08281	-0.2144	0.08635
									-0.0472	0.13809	-0.0572	0.12224	-0.0672	0.08502	-0.1072	0.0861
									0	0.14238	0	0.12244	0	0.08784	0	0.08592
									0.0472	0.13601	0.0572	0.12188	0.0672	0.08986	0.1072	0.08586
									0.0944	0.12428	0.1144	0.12316	0.1344	0.09009	0.2144	0.08565
									0.1416	0.1124	0.1716	0.12362	0.2016	0.08946	0.3216	0.08536
									0.1888	0.10536	0.2288	0.12235	0.2688	0.08857	0.4288	0.08534
									0.236	0.10802	0.286	0.11931	0.336	0.08731	0.536	0.08556
									0.2832	0.12193	0.3432	0.11859	0.4032	0.08403	0.6432	0.08639
									0.3304	0.14125	0.4004	0.12055	0.4704	0.07995	0.7504	0.08588
									0.3776	0.15437	0.4576	0.12396	0.5376	0.07839	0.8576	0.08401
									0.4248	0.14786	0.5148	0.12464	0.6048	0.07997	0.9648	0.08198
									0.472	0.12125	0.572	0.12516	0.672	0.08255	1.072	0.08119
									0.5192	0.09124	0.6292	0.12538	0.7392	0.08438	1.1792	0.08096
									0.5664	0.08115	0.6864	0.12329	0.8064	0.08639	1.2864	0.08258
									0.6136	0.10771	0.7436	0.11853	0.8736	0.08904	1.3936	0.08429
									0.6608	0.16303	0.8008	0.1153	0.9408	0.0902	1.5008	0.08596
									0.708	0.21558	0.858	0.12181	1.008	0.08868	1.608	0.08697
									0.7552	0.22313	0.9152	0.13741	1.0752	0.08575	1.7152	0.08752
									0.8024	0.17261	0.9724	0.14764	1.1424	0.08312	1.8224	0.08788
									0.8496	0.09763	1.0296	0.13754	1.2096	0.08193	1.9296	0.08872
									0.8968	0.03921	1.0868	0.11128	1.2768	0.08245	2.0368	0.08853
									0.944	0.0093	1.144	0.09488	1.344	0.0864	2.144	0.08884
									0.9912	0.00132	1.2012	0.112	1.4112	0.09135	2.2512	0.08899
									1.0384	9.37038e-05	1.2584	0.15687	1.4784	0.09345	2.3584	0.0886
									1.0856	0	1.3156	0.19663	1.5456	0.0877	2.4656	0.08774
									1.1328	0	1.3728	0.18868	1.6128	0.07907	2.5728	0.087
									1.18	0	1.43	0.13092	1.68	0.08217	2.68	0.08685
									1.2272	0	1.4872	0.06406	1.7472	0.1017	2.7872	0.08774
									1.2744	0	1.5444	0.02021	1.8144	0.12316	2.8944	0.08794
									1.3216	0	1.6016	0.00251	1.8816	0.11981	3.0016	0.08679
									1.3688	0	1.6588	0.000175263	1.9488	0.08455	3.1088	0.08642
									1.416	0	1.716	0	2.016	0.04174	3.216	0.08861
									1.4632	0	1.7732	0	2.0832	0.01317	3.3232	0.0911
									1.5104	0	1.8304	0	2.1504	0.00139	3.4304	0.092
									1.5576	0	1.8876	0	2.2176	2.65404e-05	3.5376	0.09333
									1.6048	0	1.9448	0	2.2848	0	3.6448	0.09525
									1.652	0	2.002	0	2.352	0	3.752	0.10045
									1.6992	0	2.0592	0	2.4192	0	3.8592	0.09537
									1.7464	0	2.1164	0	2.4864	0	3.9664	0.06951
									1.7936	0	2.1736	0	2.5536	0	4.0736	0.03615
									1.8408	0	2.2308	0	2.6208	0	4.1808	0.0125
									1.888	0	2.288	0	2.688	0	4.288	0.0013
									1.9352	0	2.3452	0	2.7552	0	4.3952	0
									1.9824	0	2.4024	0	2.8224	0	4.5024	0
									2.0296	0	2.4596	0	2.8896	0	4.6096	0
									2.0768	0	2.5168	0	2.9568	0	4.7168	0
									2.124	0	2.574	0	3.024	0	4.824	0
									2.1712	0	2.6312	0	3.0912	0	4.9312	0
									2.2184	0	2.6884	0	3.1584	0	5.0384	0
									2.2656	0	2.7456	0	3.2256	0	5.1456	0
									2.3128	0	2.8028	0	3.2928	0	5.2528	0
									2.36	0	2.86	0	3.36	0	5.36	0

## Sheet: Figure 10
Figure 10a								Figure 10b
	65 m2/g	85 m2/g	100 m2/g	120 m2/g					85 m2/g	100 m2/g	120 m2/g
0	0	0	0	0				-7.55242	0	0	0
1.007	1.833	3.666	5.526	7.332				-7.39829	0	0	0
3.127	3.65	7.3	11.005	14.601				-7.24416	0	0	0
6.08	4.864	9.727	14.664	19.454				-7.09003	0	0	0
8.452	5.389	10.777	16.247	21.555				-6.93589	0	0	0
10.596	5.7	11.4	17.186	22.8				-6.78176	0	0	0
13.373	6.009	12.018	18.117	24.036				-6.62763	0	0	0
15.523	6.216	12.431	18.74	24.863				-6.4735	0	0	0
								-6.31937	0	0	0
								-6.16524	0	0	0
								-6.01111	0	0	0
								-5.85698	0	0	0
								-5.70285	0	0	0
								-5.54872	0	0	0
								-5.39459	0	0	0
								-5.24045	0	0	0
								-5.08632	0	0	0
								-4.93219	0	0	0
								-4.77806	0	0	0
								-4.62393	6.62494e-06	2.30942e-05	6.62494e-06
								-4.4698	0.000130993	0.000167865	0.000150775
								-4.31567	0.000454008	0.000477442	0.000476744
								-4.16154	0.00112	0.00112	0.00113
								-4.00741	0.00214	0.00218	0.00219
								-3.85328	0.00344	0.00378	0.00383
								-3.69914	0.00517	0.00598	0.00645
								-3.54501	0.00721	0.00823	0.00961
								-3.39088	0.00952	0.01022	0.01273
								-3.23675	0.0121	0.01217	0.0153
								-3.08262	0.01507	0.0148	0.01754
								-2.92849	0.01862	0.01881	0.02024
								-2.77436	0.02288	0.02362	0.02333
								-2.62023	0.02737	0.02815	0.02653
								-2.4661	0.03168	0.03208	0.02989
								-2.31197	0.035	0.03506	0.03269
								-2.15783	0.03629	0.03684	0.03406
								-2.0037	0.0352	0.03727	0.03358
								-1.84957	0.033	0.03607	0.03182
								-1.69544	0.03096	0.03379	0.03046
								-1.54131	0.03008	0.03151	0.02992
								-1.38718	0.03014	0.02968	0.02953
								-1.23305	0.03025	0.02833	0.02906
								-1.07892	0.03014	0.02769	0.02904
								-0.92479	0.03037	0.02778	0.02922
								-0.77066	0.03064	0.028	0.02922
								-0.61652	0.03085	0.02751	0.02853
								-0.46239	0.03061	0.02651	0.02731
								-0.30826	0.0299	0.02573	0.02639
								-0.15413	0.02884	0.02573	0.02613
								0	0.02831	0.02631	0.0265
								0.15413	0.02882	0.02707	0.02689
								0.30826	0.03003	0.02765	0.027
								0.46239	0.03048	0.028	0.0268
								0.61652	0.02954	0.02849	0.02642
								0.77066	0.02797	0.029	0.02645
								0.92479	0.02684	0.02912	0.02705
								1.07892	0.02648	0.02889	0.02775
								1.23305	0.02674	0.02838	0.02823
								1.38718	0.02771	0.02849	0.0285
								1.54131	0.02896	0.02911	0.02917
								1.69544	0.02986	0.02904	0.03043
								1.84957	0.02971	0.02853	0.03132
								2.0037	0.02869	0.02819	0.03148
								2.15783	0.02781	0.02848	0.03114
								2.31197	0.02825	0.02946	0.03118
								2.4661	0.03007	0.03077	0.03173
								2.62023	0.0323	0.03245	0.03293
								2.77436	0.03398	0.03425	0.03426
								2.92849	0.0346	0.03544	0.03502
								3.08262	0.03424	0.03559	0.03514
								3.23675	0.03342	0.0348	0.03466
								3.39088	0.03274	0.03376	0.03394
								3.54501	0.03199	0.03251	0.03315
								3.69914	0.03066	0.03094	0.03157
								3.85328	0.02707	0.02763	0.02774
								4.00741	0.02062	0.02162	0.02138
								4.16154	0.01282	0.01419	0.01375
								4.31567	0.0062	0.00746	0.00715
								4.4698	0.00215	0.0029	0.00278
								4.62393	0.000492755	0.000820641	0.000782267
								4.77806	4.28759e-05	9.67419e-05	0.000102304
								4.93219	0	1.10416e-06	2.20831e-06
								5.08632	0	0	0
								5.24045	0	0	0
								5.39459	0	0	0
								5.54872	0	0	0
								5.70285	0	0	0
								5.85698	0	0	0
								6.01111	0	0	0
								6.16524	0	0	0
								6.31937	0	0	0
								6.4735	0	0	0
								6.62763	0	0	0
								6.78176	0	0	0
								6.93589	0	0	0
								7.09003	0	0	0
								7.24416	0	0	0
								7.39829	0	0	0
								7.55242	0	0	0
								7.70655	0	0	0

## Sheet: Figure 11
Figure 11a									Figure 11b								Figure 11c
	TH=2.0℃/100m		TH=3.0℃/100m		TH=4.0℃/100m					TH=2.0℃/100m		TH=3.0℃/100m		TH=4.0℃/100m				TH=2.0℃/100m		TH=3.0℃/100m		TH=4.0℃/100m
1.52322	1	1.52308	1	1.52294	1				0.0455	1	0.0455	1	0.0455	1			1.56872	1	1.56858	1	1.56844	1
1.53556	1.0975	1.53541	1.0975	1.53525	1.0975				0.04589	1.0975	0.04588	1.0975	0.04588	1.0975			1.58145	1.0975	1.58129	1.0975	1.58113	1.0975
1.5491	1.2045	1.54893	1.2045	1.54875	1.2045				0.04631	1.2045	0.04631	1.2045	0.0463	1.2045			1.59541	1.2045	1.59523	1.2045	1.59506	1.2045
1.56394	1.32194	1.56375	1.32194	1.56356	1.32194				0.04677	1.32194	0.04677	1.32194	0.04677	1.32194			1.61071	1.32194	1.61052	1.32194	1.61033	1.32194
1.58021	1.45083	1.58	1.45083	1.57979	1.45083				0.04728	1.45083	0.04728	1.45083	0.04728	1.45083			1.6275	1.45083	1.62728	1.45083	1.62707	1.45083
1.59806	1.59228	1.59782	1.59228	1.59759	1.59228				0.04784	1.59228	0.04784	1.59228	0.04784	1.59228			1.6459	1.59228	1.64566	1.59228	1.64542	1.59228
1.61762	1.74753	1.61736	1.74753	1.6171	1.74753				0.04845	1.74753	0.04845	1.74753	0.04845	1.74753			1.66607	1.74753	1.66581	1.74753	1.66554	1.74753
1.63906	1.91791	1.63877	1.91791	1.63848	1.91791				0.04913	1.91791	0.04912	1.91791	0.04912	1.91791			1.68819	1.91791	1.6879	1.91791	1.6876	1.91791
1.66257	2.1049	1.66224	2.1049	1.66192	2.1049				0.04987	2.1049	0.04986	2.1049	0.04986	2.1049			1.71243	2.1049	1.71211	2.1049	1.71178	2.1049
1.68833	2.31013	1.68797	2.31013	1.6876	2.31013				0.05068	2.31013	0.05067	2.31013	0.05067	2.31013			1.739	2.31013	1.73864	2.31013	1.73827	2.31013
1.71655	2.53536	1.71615	2.53536	1.71575	2.53536				0.05157	2.53536	0.05156	2.53536	0.05156	2.53536			1.76812	2.53536	1.76771	2.53536	1.76731	2.53536
1.74748	2.78256	1.74703	2.78256	1.74658	2.78256				0.05255	2.78256	0.05254	2.78256	0.05254	2.78256			1.80002	2.78256	1.79957	2.78256	1.79911	2.78256
1.78136	3.05386	1.78085	3.05386	1.78035	3.05386				0.05362	3.05386	0.05361	3.05386	0.05361	3.05386			1.83497	3.05386	1.83446	3.05386	1.83396	3.05386
1.81846	3.3516	1.8179	3.3516	1.81733	3.3516				0.05479	3.3516	0.05479	3.3516	0.05478	3.3516			1.87325	3.3516	1.87268	3.3516	1.87212	3.3516
1.85909	3.67838	1.85846	3.67838	1.85783	3.67838				0.05609	3.67838	0.05608	3.67838	0.05607	3.67838			1.91518	3.67838	1.91454	3.67838	1.9139	3.67838
1.90357	4.03702	1.90286	4.03702	1.90215	4.03702				0.0575	4.03702	0.0575	4.03702	0.05749	4.03702			1.96107	4.03702	1.96036	4.03702	1.95964	4.03702
1.95226	4.43062	1.95146	4.43062	1.95066	4.43062				0.05906	4.43062	0.05905	4.43062	0.05904	4.43062			2.01132	4.43062	2.01051	4.43062	2.0097	4.43062
2.00553	4.8626	2.00463	4.8626	2.00373	4.8626				0.06077	4.8626	0.06076	4.8626	0.06075	4.8626			2.0663	4.8626	2.06539	4.8626	2.06448	4.8626
2.06381	5.3367	2.0628	5.3367	2.06178	5.3367				0.06264	5.3367	0.06263	5.3367	0.06262	5.3367			2.12645	5.3367	2.12543	5.3367	2.1244	5.3367
2.12754	5.85702	2.1264	5.85702	2.12525	5.85702				0.0647	5.85702	0.06469	5.85702	0.06468	5.85702			2.19224	5.85702	2.19108	5.85702	2.18993	5.85702
2.19722	6.42807	2.19592	6.42807	2.19462	6.42807				0.06696	6.42807	0.06695	6.42807	0.06693	6.42807			2.26418	6.42807	2.26286	6.42807	2.26155	6.42807
2.27336	7.0548	2.27189	7.0548	2.27041	7.0548				0.06944	7.0548	0.06942	7.0548	0.06941	7.0548			2.3428	7.0548	2.34131	7.0548	2.33982	7.0548
2.35653	7.74264	2.35486	7.74264	2.35319	7.74264				0.07216	7.74264	0.07214	7.74264	0.07212	7.74264			2.42869	7.74264	2.427	7.74264	2.42531	7.74264
2.44735	8.49753	2.44544	8.49753	2.44354	8.49753				0.07515	8.49753	0.07513	8.49753	0.0751	8.49753			2.5225	8.49753	2.52057	8.49753	2.51864	8.49753
2.54646	9.32603	2.54429	9.32603	2.54212	9.32603				0.07842	9.32603	0.0784	9.32603	0.07838	9.32603			2.62489	9.32603	2.62269	9.32603	2.62049	9.32603
2.65457	10.2353	2.65209	10.2353	2.64961	10.2353				0.08202	10.2353	0.08199	10.2353	0.08197	10.2353			2.7366	10.2353	2.73408	10.2353	2.73157	10.2353
2.77243	11.2332	2.76958	11.2332	2.76674	11.2332				0.08597	11.2332	0.08594	11.2332	0.08591	11.2332			2.8584	11.2332	2.85552	11.2332	2.85265	11.2332
2.90082	12.3285	2.89756	12.3285	2.89431	12.3285				0.09031	12.3285	0.09027	12.3285	0.09024	12.3285			2.99113	12.3285	2.98783	12.3285	2.98454	12.3285
3.04061	13.5305	3.03686	13.5305	3.03312	13.5305				0.09507	13.5305	0.09503	13.5305	0.09498	13.5305			3.13568	13.5305	3.13189	13.5305	3.12811	13.5305
3.19268	14.8497	3.18837	14.8497	3.18407	14.8497				0.10029	14.8497	0.10024	14.8497	0.10019	14.8497			3.29297	14.8497	3.28861	14.8497	3.28426	14.8497
3.35797	16.2975	3.35301	16.2975	3.34806	16.2975				0.10603	16.2975	0.10597	16.2975	0.10591	16.2975			3.464	16.2975	3.45898	16.2975	3.45397	16.2975
3.53749	17.8865	3.53177	17.8865	3.52605	17.8865				0.11233	17.8865	0.11226	17.8865	0.11219	17.8865			3.64982	17.8865	3.64403	17.8865	3.63824	17.8865
3.73226	19.6304	3.72565	19.6304	3.71905	19.6304				0.11924	19.6304	0.11916	19.6304	0.11908	19.6304			3.8515	19.6304	3.84481	19.6304	3.83813	19.6304
3.94336	21.5444	3.93572	21.5444	3.92808	21.5444				0.12683	21.5444	0.12674	21.5444	0.12664	21.5444			4.07019	21.5444	4.06245	21.5444	4.05473	21.5444
4.1719	23.6449	4.16304	23.6449	4.15421	23.6449				0.13516	23.6449	0.13505	23.6449	0.13494	23.6449			4.30706	23.6449	4.2981	23.6449	4.28915	23.6449
4.419	25.9502	4.40874	25.9502	4.3985	25.9502				0.14431	25.9502	0.14418	25.9502	0.14406	25.9502			4.56331	25.9502	4.55292	25.9502	4.54256	25.9502
4.68583	28.4804	4.67393	28.4804	4.66205	28.4804				0.15435	28.4804	0.1542	28.4804	0.15405	28.4804			4.84018	28.4804	4.82813	28.4804	4.81611	28.4804
4.97354	31.2572	4.95972	31.2572	4.94594	31.2572				0.16538	31.2572	0.1652	31.2572	0.16503	31.2572			5.13891	31.2572	5.12493	31.2572	5.11097	31.2572
5.28327	34.3047	5.26723	34.3047	5.25122	34.3047				0.17748	34.3047	0.17728	34.3047	0.17708	34.3047			5.46076	34.3047	5.44451	34.3047	5.4283	34.3047
5.61616	37.6494	5.59752	37.6494	5.57893	37.6494				0.19078	37.6494	0.19054	37.6494	0.1903	37.6494			5.80694	37.6494	5.78806	37.6494	5.76922	37.6494
5.97327	41.3201	5.95161	41.3201	5.93001	41.3201				0.20538	41.3201	0.2051	41.3201	0.20481	41.3201			6.17865	41.3201	6.15671	41.3201	6.13482	41.3201
6.35563	45.3488	6.33046	45.3488	6.30536	45.3488				0.22142	45.3488	0.22108	45.3488	0.22074	45.3488			6.57705	45.3488	6.55153	45.3488	6.5261	45.3488
6.76415	49.7702	6.7349	49.7702	6.70575	49.7702				0.23903	49.7702	0.23862	49.7702	0.23822	49.7702			7.00318	49.7702	6.97353	49.7702	6.94397	49.7702
7.19965	54.6228	7.16567	54.6228	7.13181	54.6228				0.25837	54.6228	0.25789	54.6228	0.25741	54.6228			7.45802	54.6228	7.42356	54.6228	7.38922	54.6228
7.66279	59.9484	7.62333	59.9484	7.58402	59.9484				0.27961	59.9484	0.27905	59.9484	0.27848	59.9484			7.94241	59.9484	7.90237	59.9484	7.8625	59.9484
8.15405	65.7933	8.10825	65.7933	8.06265	65.7933				0.30296	65.7933	0.30227	65.7933	0.30159	65.7933			8.457	65.7933	8.41052	65.7933	8.36424	65.7933
8.67369	72.2081	8.62059	72.2081	8.56772	72.2081				0.32859	72.2081	0.32778	72.2081	0.32697	72.2081			9.00229	72.2081	8.94837	72.2081	8.89469	72.2081
9.22177	79.2483	9.16024	79.2483	9.09902	79.2483				0.35676	79.2483	0.35579	79.2483	0.35482	79.2483			9.57853	79.2483	9.51603	79.2483	9.45384	79.2483
9.79803	86.9749	9.72682	86.9749	9.65599	86.9749				0.38771	86.9749	0.38655	86.9749	0.38539	86.9749			10.1858	86.9749	10.1134	86.9749	10.0414	86.9749
10.4019	95.4548	10.3196	95.4548	10.2378	95.4548				0.42173	95.4548	0.42033	95.4548	0.41895	95.4548			10.8237	95.4548	10.74	95.4548	10.6567	95.4548
11.0326	104.762	10.9376	104.762	10.8431	104.762				0.45911	104.762	0.45743	104.762	0.45577	104.762			11.4917	104.762	11.395	104.762	11.2989	104.762
11.6888	114.976	11.5793	114.976	11.4705	114.976				0.50019	114.976	0.49818	114.976	0.49619	114.976			12.189	114.976	12.0775	114.976	11.9666	114.976
12.3689	126.186	12.2429	126.186	12.1177	126.186				0.54535	126.186	0.54293	126.186	0.54054	126.186			12.9143	126.186	12.7858	126.186	12.6583	126.186
13.071	138.489	12.9262	138.489	12.7824	138.489				0.595	138.489	0.5921	138.489	0.58921	138.489			13.666	138.489	13.5183	138.489	13.3717	138.489
13.7926	151.991	13.6265	151.991	13.4618	151.991				0.6496	151.991	0.64609	151.991	0.64262	151.991			14.4422	151.991	14.2726	151.991	14.1044	151.991
14.5309	166.81	14.3409	166.81	14.1524	166.81				0.70963	166.81	0.7054	166.81	0.70122	166.81			15.2406	166.81	15.0463	166.81	14.8536	166.81
15.2829	183.074	15.0658	183.074	14.8506	183.074				0.77566	183.074	0.77054	183.074	0.7655	183.074			16.0586	183.074	15.8363	183.074	15.6161	183.074
16.0451	200.923	15.7975	200.923	15.5523	200.923				0.84828	200.923	0.8421	200.923	0.83602	200.923			16.8934	200.923	16.6396	200.923	16.3883	200.923
16.8135	220.513	16.5319	220.513	16.253	220.513				0.92817	220.513	0.9207	220.513	0.91334	220.513			17.7417	220.513	17.4526	220.513	17.1664	220.513
17.5843	242.013	17.2645	242.013	16.948	242.013				1.01608	242.013	1.00701	242.013	0.99812	242.013			18.6003	242.013	18.2715	242.013	17.9461	242.013
18.3529	265.609	17.9906	265.609	17.6322	265.609				1.11279	265.609	1.1018	265.609	1.09105	265.609			19.4657	265.609	19.0924	265.609	18.7233	265.609
19.115	291.505	18.7053	291.505	18.3003	291.505				1.21923	291.505	1.20587	291.505	1.19284	291.505			20.3342	291.505	19.9112	291.505	19.4932	291.505
19.8659	319.927	19.4036	319.927	18.9469	319.927				1.33636	319.927	1.32011	319.927	1.30433	319.927			21.2023	319.927	20.7237	319.927	20.2512	319.927
20.601	351.119	20.0804	351.119	19.5662	351.119				1.46525	351.119	1.44549	351.119	1.42633	351.119			22.0662	351.119	21.5258	351.119	20.9926	351.119
21.3155	385.353	20.7304	385.353	20.1528	385.353				1.60708	385.353	1.58303	385.353	1.55977	385.353			22.9226	385.353	22.3134	385.353	21.7126	385.353
22.0049	422.924	21.3484	422.924	20.7008	422.924				1.76315	422.924	1.7338	422.924	1.70557	422.924			23.768	422.924	23.0822	422.924	22.4063	422.924
22.6645	464.159	21.9293	464.159	21.2045	464.159				1.93482	464.159	1.899	464.159	1.86471	464.159			24.5993	464.159	23.8284	464.159	23.0692	464.159
23.29	509.414	22.4681	509.414	21.6581	509.414				2.12357	509.414	2.07983	509.414	2.0382	509.414			25.4136	509.414	24.548	509.414	23.6963	509.414
23.877	559.081	22.9597	559.081	22.0561	559.081				2.33098	559.081	2.27756	559.081	2.227	559.081			26.208	559.081	25.2373	559.081	24.2831	559.081
24.4215	613.591	23.3993	613.591	22.3928	613.591				2.55872	613.591	2.49343	613.591	2.43207	613.591			26.9802	613.591	25.8927	613.591	24.8248	613.591
24.9195	673.415	23.782	673.415	22.6624	673.415				2.80846	673.415	2.72871	673.415	2.6543	673.415			27.728	673.415	26.5107	673.415	25.3167	673.415
25.3673	739.072	24.1031	739.072	22.8594	739.072				3.082	739.072	2.98458	739.072	2.89446	739.072			28.4492	739.072	27.0877	739.072	25.7539	739.072
25.7611	811.131	24.358	811.131	22.9782	811.131				3.38089	811.131	3.26209	811.131	3.15319	811.131			29.142	811.131	27.6201	811.131	26.1314	811.131
26.0977	890.215	24.5421	890.215	23.013	890.215				3.70667	890.215	3.56201	890.215	3.43076	890.215			29.8043	890.215	28.1041	890.215	26.4437	890.215
26.3735	977.01	24.6506	977.01	22.9578	977.01				4.06061	977.01	3.88497	977.01	3.7273	977.01			30.4341	977.01	28.5356	977.01	26.6851	977.01
26.5852	1072.27	24.679	1072.27	22.8067	1072.27				4.44349	1072.27	4.23101	1072.27	4.04244	1072.27			31.0287	1072.27	28.91	1072.27	26.8491	1072.27
26.7295	1176.81	24.6223	1176.81	22.5532	1176.81				4.85562	1176.81	4.5997	1176.81	4.37537	1176.81			31.5851	1176.81	29.222	1176.81	26.9285	1176.81
26.8031	1291.55	24.4754	1291.55	22.1906	1291.55				5.29652	1291.55	4.99006	1291.55	4.72483	1291.55			32.0996	1291.55	29.4655	1291.55	26.9155	1291.55
26.8024	1417.47	24.2331	1417.47	21.7118	1417.47				5.76475	1417.47	5.40041	1417.47	5.08906	1417.47			32.5671	1417.47	29.6335	1417.47	26.8009	1417.47
26.7237	1555.68	23.8895	1555.68	21.1091	1555.68				6.25797	1555.68	5.82837	1555.68	5.46574	1555.68			32.9817	1555.68	29.7179	1555.68	26.5748	1555.68
26.5631	1707.35	23.4385	1707.35	20.374	1707.35				6.77267	1707.35	6.27082	1707.35	5.8521	1707.35			33.3358	1707.35	29.7093	1707.35	26.2261	1707.35
26.3164	1873.82	22.8734	1873.82	19.4974	1873.82				7.30463	1873.82	6.72412	1873.82	6.24521	1873.82			33.621	1873.82	29.5975	1873.82	25.7426	1873.82
25.9789	2056.51	22.1868	2056.51	18.4692	2056.51				7.84869	2056.51	7.18443	2056.51	6.64181	2056.51			33.8276	2056.51	29.3712	2056.51	25.111	2056.51
25.5456	2257.02	21.3706	2257.02	17.2786	2257.02				8.3994	2257.02	7.64748	2257.02	7.03853	2257.02			33.945	2257.02	29.0181	2257.02	24.3171	2257.02
25.0108	2477.08	20.4159	2477.08	15.9133	2477.08				8.95126	2477.08	8.10935	2477.08	7.4325	2477.08			33.962	2477.08	28.5252	2477.08	23.3458	2477.08
24.3681	2718.59	19.3128	2718.59	14.3599	2718.59				9.49912	2718.59	8.56614	2718.59	7.82076	2718.59			33.8673	2718.59	27.8789	2718.59	22.1807	2718.59
23.6108	2983.65	18.0504	2983.65	12.6036	2983.65				10.0386	2983.65	9.01488	2983.65	8.20053	2983.65			33.6493	2983.65	27.0653	2983.65	20.8042	2983.65
									10.5655	3274.55	9.45213	3274.55	8.57016	3274.55
									11.0783	3593.81	9.87603	3593.81	8.92784	3593.81
									11.5727	3944.21	10.2847	3944.21	9.27192	3944.21
									12.0494	4328.76	10.6785	4328.76	9.60262	4328.76
									12.5071	4750.81	11.0558	4750.81	9.91948	4750.81
									12.946	5214.01	11.4155	5214.01	10.2214	5214.01
									13.3651	5722.37	11.7592	5722.37	10.509	5722.37

## Sheet: Figure 12
Figure 12a										Figure 12b									Figure 12c
	PH=0.85/100m		PH=0.95/100m		PH=1.05/100m						PH=0.85/100m		PH=0.95/100m		PH=1.05/100m					PH=0.85/100m		PH=0.95/100m		PH=1.05/100m
1.50972	1	1.52308	1	1.53643	1					0.04508	1	0.0455	1	0.04592	1				0.04508	1	0.0455	1	0.04592	1
1.52075	1.0975	1.53541	1.0975	1.55005	1.0975					0.04543	1.0975	0.04588	1.0975	0.04634	1.0975				0.04543	1.0975	0.04588	1.0975	0.04634	1.0975
1.53285	1.2045	1.54893	1.2045	1.56498	1.2045					0.04581	1.2045	0.04631	1.2045	0.04681	1.2045				0.04581	1.2045	0.04631	1.2045	0.04681	1.2045
1.54612	1.32194	1.56375	1.32194	1.58136	1.32194					0.04622	1.32194	0.04677	1.32194	0.04732	1.32194				0.04622	1.32194	0.04677	1.32194	0.04732	1.32194
1.56068	1.45083	1.58	1.45083	1.59931	1.45083					0.04668	1.45083	0.04728	1.45083	0.04788	1.45083				0.04668	1.45083	0.04728	1.45083	0.04788	1.45083
1.57663	1.59228	1.59782	1.59228	1.61899	1.59228					0.04718	1.59228	0.04784	1.59228	0.0485	1.59228				0.04718	1.59228	0.04784	1.59228	0.0485	1.59228
1.59413	1.74753	1.61736	1.74753	1.64056	1.74753					0.04772	1.74753	0.04845	1.74753	0.04918	1.74753				0.04772	1.74753	0.04845	1.74753	0.04918	1.74753
1.6133	1.91791	1.63877	1.91791	1.6642	1.91791					0.04833	1.91791	0.04912	1.91791	0.04992	1.91791				0.04833	1.91791	0.04912	1.91791	0.04992	1.91791
1.63433	2.1049	1.66224	2.1049	1.69012	2.1049					0.04899	2.1049	0.04986	2.1049	0.05074	2.1049				0.04899	2.1049	0.04986	2.1049	0.05074	2.1049
1.65737	2.31013	1.68797	2.31013	1.71851	2.31013					0.04971	2.31013	0.05067	2.31013	0.05164	2.31013				0.04971	2.31013	0.05067	2.31013	0.05164	2.31013
1.68262	2.53536	1.71615	2.53536	1.74961	2.53536					0.05051	2.53536	0.05156	2.53536	0.05262	2.53536				0.05051	2.53536	0.05156	2.53536	0.05262	2.53536
1.7103	2.78256	1.74703	2.78256	1.78369	2.78256					0.05138	2.78256	0.05254	2.78256	0.0537	2.78256				0.05138	2.78256	0.05254	2.78256	0.0537	2.78256
1.74061	3.05386	1.78085	3.05386	1.821	3.05386					0.05234	3.05386	0.05361	3.05386	0.05488	3.05386				0.05234	3.05386	0.05361	3.05386	0.05488	3.05386
1.77382	3.3516	1.8179	3.3516	1.86187	3.3516					0.05339	3.3516	0.05479	3.3516	0.05618	3.3516				0.05339	3.3516	0.05479	3.3516	0.05618	3.3516
1.81019	3.67838	1.85846	3.67838	1.9066	3.67838					0.05455	3.67838	0.05608	3.67838	0.05761	3.67838				0.05455	3.67838	0.05608	3.67838	0.05761	3.67838
1.85002	4.03702	1.90286	4.03702	1.95555	4.03702					0.05582	4.03702	0.0575	4.03702	0.05918	4.03702				0.05582	4.03702	0.0575	4.03702	0.05918	4.03702
1.89362	4.43062	1.95146	4.43062	2.00912	4.43062					0.05721	4.43062	0.05905	4.43062	0.0609	4.43062				0.05721	4.43062	0.05905	4.43062	0.0609	4.43062
1.94133	4.8626	2.00463	4.8626	2.06771	4.8626					0.05873	4.8626	0.06076	4.8626	0.06278	4.8626				0.05873	4.8626	0.06076	4.8626	0.06278	4.8626
1.99355	5.3367	2.0628	5.3367	2.13178	5.3367					0.06041	5.3367	0.06263	5.3367	0.06486	5.3367				0.06041	5.3367	0.06263	5.3367	0.06486	5.3367
2.05066	5.85702	2.1264	5.85702	2.20182	5.85702					0.06225	5.85702	0.06469	5.85702	0.06713	5.85702				0.06225	5.85702	0.06469	5.85702	0.06713	5.85702
2.11311	6.42807	2.19592	6.42807	2.27835	6.42807					0.06427	6.42807	0.06695	6.42807	0.06962	6.42807				0.06427	6.42807	0.06695	6.42807	0.06962	6.42807
2.18139	7.0548	2.27189	7.0548	2.36193	7.0548					0.06648	7.0548	0.06942	7.0548	0.07236	7.0548				0.06648	7.0548	0.06942	7.0548	0.07236	7.0548
2.25599	7.74264	2.35486	7.74264	2.45319	7.74264					0.06891	7.74264	0.07214	7.74264	0.07537	7.74264				0.06891	7.74264	0.07214	7.74264	0.07537	7.74264
2.33748	8.49753	2.44544	8.49753	2.55276	8.49753					0.07158	8.49753	0.07513	8.49753	0.07867	8.49753				0.07158	8.49753	0.07513	8.49753	0.07867	8.49753
2.42645	9.32603	2.54429	9.32603	2.66136	9.32603					0.07451	9.32603	0.0784	9.32603	0.08229	9.32603				0.07451	9.32603	0.0784	9.32603	0.08229	9.32603
2.52353	10.2353	2.65209	10.2353	2.77972	10.2353					0.07773	10.2353	0.08199	10.2353	0.08626	10.2353				0.07773	10.2353	0.08199	10.2353	0.08626	10.2353
2.62942	11.2332	2.76958	11.2332	2.90865	11.2332					0.08126	11.2332	0.08594	11.2332	0.09063	11.2332				0.08126	11.2332	0.08594	11.2332	0.09063	11.2332
2.74483	12.3285	2.89756	12.3285	3.04899	12.3285					0.08513	12.3285	0.09027	12.3285	0.09542	12.3285				0.08513	12.3285	0.09027	12.3285	0.09542	12.3285
2.87055	13.5305	3.03686	13.5305	3.20162	13.5305					0.08938	13.5305	0.09503	13.5305	0.10067	13.5305				0.08938	13.5305	0.09503	13.5305	0.10067	13.5305
3.00741	14.8497	3.18837	14.8497	3.36748	14.8497					0.09405	14.8497	0.10024	14.8497	0.10645	14.8497				0.09405	14.8497	0.10024	14.8497	0.10645	14.8497
3.15626	16.2975	3.35301	16.2975	3.54757	16.2975					0.09917	16.2975	0.10597	16.2975	0.11278	16.2975				0.09917	16.2975	0.10597	16.2975	0.11278	16.2975
3.31804	17.8865	3.53177	17.8865	3.7429	17.8865					0.10479	17.8865	0.11226	17.8865	0.11973	17.8865				0.10479	17.8865	0.11226	17.8865	0.11973	17.8865
3.49369	19.6304	3.72565	19.6304	3.95453	19.6304					0.11096	19.6304	0.11916	19.6304	0.12737	19.6304				0.11096	19.6304	0.11916	19.6304	0.12737	19.6304
3.68423	21.5444	3.93572	21.5444	4.18356	21.5444					0.11773	21.5444	0.12674	21.5444	0.13575	21.5444				0.11773	21.5444	0.12674	21.5444	0.13575	21.5444
3.8907	23.6449	4.16304	23.6449	4.4311	23.6449					0.12517	23.6449	0.13505	23.6449	0.14494	23.6449				0.12517	23.6449	0.13505	23.6449	0.14494	23.6449
4.11415	25.9502	4.40874	25.9502	4.69829	25.9502					0.13333	25.9502	0.14418	25.9502	0.15504	25.9502				0.13333	25.9502	0.14418	25.9502	0.15504	25.9502
4.35569	28.4804	4.67393	28.4804	4.98624	28.4804					0.14228	28.4804	0.1542	28.4804	0.16613	28.4804				0.14228	28.4804	0.1542	28.4804	0.16613	28.4804
4.61642	31.2572	4.95972	31.2572	5.29608	31.2572					0.15212	31.2572	0.1652	31.2572	0.1783	31.2572				0.15212	31.2572	0.1652	31.2572	0.1783	31.2572
4.89744	34.3047	5.26723	34.3047	5.62888	34.3047					0.16291	34.3047	0.17728	34.3047	0.19166	34.3047				0.16291	34.3047	0.17728	34.3047	0.19166	34.3047
5.19985	37.6494	5.59752	37.6494	5.98569	37.6494					0.17476	37.6494	0.19054	37.6494	0.20634	37.6494				0.17476	37.6494	0.19054	37.6494	0.20634	37.6494
5.52471	41.3201	5.95161	41.3201	6.36746	41.3201					0.18776	41.3201	0.2051	41.3201	0.22245	41.3201				0.18776	41.3201	0.2051	41.3201	0.22245	41.3201
5.87304	45.3488	6.33046	45.3488	6.77506	45.3488					0.20204	45.3488	0.22108	45.3488	0.24014	45.3488				0.20204	45.3488	0.22108	45.3488	0.24014	45.3488
6.24578	49.7702	6.7349	49.7702	7.20921	49.7702					0.21772	49.7702	0.23862	49.7702	0.25956	49.7702				0.21772	49.7702	0.23862	49.7702	0.25956	49.7702
6.64376	54.6228	7.16567	54.6228	7.6705	54.6228					0.23492	54.6228	0.25789	54.6228	0.28089	54.6228				0.23492	54.6228	0.25789	54.6228	0.28089	54.6228
7.06772	59.9484	7.62333	59.9484	8.15932	59.9484					0.25382	59.9484	0.27905	59.9484	0.30432	59.9484				0.25382	59.9484	0.27905	59.9484	0.30432	59.9484
7.51821	65.7933	8.10825	65.7933	8.67584	65.7933					0.27456	65.7933	0.30227	65.7933	0.33005	65.7933				0.27456	65.7933	0.30227	65.7933	0.33005	65.7933
7.99562	72.2081	8.62059	72.2081	9.21998	72.2081					0.29733	72.2081	0.32778	72.2081	0.3583	72.2081				0.29733	72.2081	0.32778	72.2081	0.3583	72.2081
8.50009	79.2483	9.16024	79.2483	9.79137	79.2483					0.32233	79.2483	0.35579	79.2483	0.38934	79.2483				0.32233	79.2483	0.35579	79.2483	0.38934	79.2483
9.03155	86.9749	9.72682	86.9749	10.3893	86.9749					0.34977	86.9749	0.38655	86.9749	0.42343	86.9749				0.34977	86.9749	0.38655	86.9749	0.42343	86.9749
9.5896	95.4548	10.3196	95.4548	11.0128	95.4548					0.37991	95.4548	0.42033	95.4548	0.46087	95.4548				0.37991	95.4548	0.42033	95.4548	0.46087	95.4548
10.1736	104.762	10.9376	104.762	11.6604	104.762					0.413	104.762	0.45743	104.762	0.50201	104.762				0.413	104.762	0.45743	104.762	0.50201	104.762
10.7823	114.976	11.5793	114.976	12.3303	114.976					0.44934	114.976	0.49818	114.976	0.5472	114.976				0.44934	114.976	0.49818	114.976	0.5472	114.976
11.4146	126.186	12.2429	126.186	13.0204	126.186					0.48923	126.186	0.54293	126.186	0.59685	126.186				0.48923	126.186	0.54293	126.186	0.59685	126.186
12.0684	138.489	12.9262	138.489	13.728	138.489					0.53304	138.489	0.5921	138.489	0.65141	138.489				0.53304	138.489	0.5921	138.489	0.65141	138.489
12.7416	151.991	13.6265	151.991	14.4502	151.991					0.58113	151.991	0.64609	151.991	0.71134	151.991				0.58113	151.991	0.64609	151.991	0.71134	151.991
13.4316	166.81	14.3409	166.81	15.1835	166.81					0.63395	166.81	0.7054	166.81	0.7772	166.81				0.63395	166.81	0.7054	166.81	0.7772	166.81
14.1353	183.074	15.0658	183.074	15.9243	183.074					0.69193	183.074	0.77054	183.074	0.84958	183.074				0.69193	183.074	0.77054	183.074	0.84958	183.074
14.8492	200.923	15.7975	200.923	16.6685	200.923					0.7556	200.923	0.8421	200.923	0.92911	200.923				0.7556	200.923	0.8421	200.923	0.92911	200.923
15.5695	220.513	16.5319	220.513	17.4117	220.513					0.82549	220.513	0.9207	220.513	1.01649	220.513				0.82549	220.513	0.9207	220.513	1.01649	220.513
16.292	242.013	17.2645	242.013	18.1493	242.013					0.90223	242.013	1.00701	242.013	1.11251	242.013				0.90223	242.013	1.00701	242.013	1.11251	242.013
17.0122	265.609	17.9906	265.609	18.8765	265.609					0.98645	265.609	1.1018	265.609	1.218	265.609				0.98645	265.609	1.1018	265.609	1.218	265.609
17.7254	291.505	18.7053	291.505	19.5884	291.505					1.07888	291.505	1.20587	291.505	1.33388	291.505				1.07888	291.505	1.20587	291.505	1.33388	291.505
18.4266	319.927	19.4036	319.927	20.28	319.927					1.18029	319.927	1.32011	319.927	1.46114	319.927				1.18029	319.927	1.32011	319.927	1.46114	319.927
19.1105	351.119	20.0804	351.119	20.9462	351.119					1.29152	351.119	1.44549	351.119	1.60087	351.119				1.29152	351.119	1.44549	351.119	1.60087	351.119
19.7719	385.353	20.7304	385.353	21.5821	385.353					1.41348	385.353	1.58303	385.353	1.75419	385.353				1.41348	385.353	1.58303	385.353	1.75419	385.353
20.4055	422.924	21.3484	422.924	22.1825	422.924					1.54714	422.924	1.7338	422.924	1.92236	422.924				1.54714	422.924	1.7338	422.924	1.92236	422.924
21.0058	464.159	21.9293	464.159	22.7427	464.159					1.69352	464.159	1.899	464.159	2.10665	464.159				1.69352	464.159	1.899	464.159	2.10665	464.159
21.5675	509.414	22.4681	509.414	23.2578	509.414					1.8537	509.414	2.07983	509.414	2.30844	509.414				1.8537	509.414	2.07983	509.414	2.30844	509.414
22.0852	559.081	22.9597	559.081	23.7232	559.081					2.02883	559.081	2.27756	559.081	2.52907	559.081				2.02883	559.081	2.27756	559.081	2.52907	559.081
22.5538	613.591	23.3993	613.591	24.1343	613.591					2.22001	613.591	2.49343	613.591	2.76991	613.591				2.22001	613.591	2.49343	613.591	2.76991	613.591
22.9681	673.415	23.782	673.415	24.4867	673.415					2.42846	673.415	2.72871	673.415	3.03229	673.415				2.42846	673.415	2.72871	673.415	3.03229	673.415
23.3228	739.072	24.1031	739.072	24.7761	739.072					2.65528	739.072	2.98458	739.072	3.31735	739.072				2.65528	739.072	2.98458	739.072	3.31735	739.072
23.6131	811.131	24.358	811.131	24.9981	811.131					2.90151	811.131	3.26209	811.131	3.62613	811.131				2.90151	811.131	3.26209	811.131	3.62613	811.131
23.8338	890.215	24.5421	890.215	25.1486	890.215					3.16803	890.215	3.56201	890.215	3.95926	890.215				3.16803	890.215	3.56201	890.215	3.95926	890.215
23.9799	977.01	24.6506	977.01	25.223	977.01					3.45557	977.01	3.88497	977.01	4.31702	977.01				3.45557	977.01	3.88497	977.01	4.31702	977.01
24.0465	1072.27	24.679	1072.27	25.2171	1072.27					3.76449	1072.27	4.23101	1072.27	4.69905	1072.27				3.76449	1072.27	4.23101	1072.27	4.69905	1072.27
24.0283	1176.81	24.6223	1176.81	25.1261	1176.81					4.09487	1176.81	4.5997	1176.81	5.10446	1176.81				4.09487	1176.81	4.5997	1176.81	5.10446	1176.81
23.9199	1291.55	24.4754	1291.55	24.9453	1291.55					4.44622	1291.55	4.99006	1291.55	5.53159	1291.55				4.44622	1291.55	4.99006	1291.55	5.53159	1291.55
23.7158	1417.47	24.2331	1417.47	24.6694	1417.47					4.81747	1417.47	5.40041	1417.47	5.97783	1417.47				4.81747	1417.47	5.40041	1417.47	5.97783	1417.47
23.41	1555.68	23.8895	1555.68	24.2929	1555.68					5.20706	1555.68	5.82837	1555.68	6.44007	1555.68				5.20706	1555.68	5.82837	1555.68	6.44007	1555.68
22.9962	1707.35	23.4385	1707.35	23.8097	1707.35					5.61271	1707.35	6.27082	1707.35	6.9145	1707.35				5.61271	1707.35	6.27082	1707.35	6.9145	1707.35
22.4676	1873.82	22.8734	1873.82	23.2132	1873.82					6.0316	1873.82	6.72412	1873.82	7.39677	1873.82				6.0316	1873.82	6.72412	1873.82	7.39677	1873.82
21.8166	2056.51	22.1868	2056.51	22.4961	2056.51					6.46041	2056.51	7.18443	2056.51	7.88244	2056.51				6.46041	2056.51	7.18443	2056.51	7.88244	2056.51
21.0351	2257.02	21.3706	2257.02	21.6504	2257.02					6.89546	2257.02	7.64748	2257.02	8.36718	2257.02				6.89546	2257.02	7.64748	2257.02	8.36718	2257.02
20.1142	2477.08	20.4159	2477.08	20.667	2477.08					7.33307	2477.08	8.10935	2477.08	8.84682	2477.08				7.33307	2477.08	8.10935	2477.08	8.84682	2477.08
19.044	2718.59	19.3128	2718.59	19.5362	2718.59					7.76946	2718.59	8.56614	2718.59	9.31772	2718.59				7.76946	2718.59	8.56614	2718.59	9.31772	2718.59
17.8135	2983.65	18.0504	2983.65	18.2469	2983.65					8.20109	2983.65	9.01488	2983.65	9.7776	2983.65				8.20109	2983.65	9.01488	2983.65	9.7776	2983.65
										8.62461	3274.55	9.45213	3274.55	10.2225	3274.55				8.62461	3274.55	9.45213	3274.55	10.2225	3274.55
										9.03885	3593.81	9.87603	3593.81	10.6525	3593.81				9.03885	3593.81	9.87603	3593.81	10.6525	3593.81
										9.43972	3944.21	10.2847	3944.21	11.0669	3944.21				9.43972	3944.21	10.2847	3944.21	11.0669	3944.21
										9.82712	4328.76	10.6785	4328.76	11.4624	4328.76				9.82712	4328.76	10.6785	4328.76	11.4624	4328.76
										10.1994	4750.81	11.0558	4750.81	11.8416	4750.81				10.1994	4750.81	11.0558	4750.81	11.8416	4750.81
										10.5561	5214.01	11.4155	5214.01	12.2034	5214.01				10.5561	5214.01	11.4155	5214.01	12.2034	5214.01
										10.8968	5722.37	11.7592	5722.37	12.5487	5722.37				10.8968	5722.37	11.7592	5722.37	12.5487	5722.37
